# Supplementary material for: Characteristics of and Public Health Responses to the Coronavirus Disease 2019 Outbreak in China
Source: PubMed Central journal article supplement (PMC7074453; doi:10.3390/jcm9020575), 2020-02-20
Supplement: jcm-09-00575-s001.pdf [file jcm-09-00575-s001.pdf]

### **Supplementary Data 1**

The case information is from the reports released by official channels (the links are as follows).

#### **Fatality Cases**

link accessed on Feb 3, 2020

Patient 1-17: <http://www.nhc.gov.cn/yjb/s3578/202001/5d19a4f6d3154b9fae328918ed2e3c8a.shtml>.

Patient

18-32: [http://wjw.hubei.gov.cn/bmdt/ztl/fkxxgzbdgrfyyq/xxfb/202001/t20200125\\_2014855.shtml](http://wjw.hubei.gov.cn/bmdt/ztl/fkxxgzbdgrfyyq/xxfb/202001/t20200125_2014855.shtml).

Patient 33-39: [http://wjw.hubei.gov.cn/fbjd/dtyw/202001/t20200124\\_2014626.shtml](http://wjw.hubei.gov.cn/fbjd/dtyw/202001/t20200124_2014626.shtml).

Patient 40 : <http://www.hebwsjs.gov.cn/index.do?id=395652&templet=content&cid=3714>.

Patient 41 : [http://wjw.beijing.gov.cn/xwzx\\_20031/wnxw/202001/t20200127\\_1621454.html](http://wjw.beijing.gov.cn/xwzx_20031/wnxw/202001/t20200127_1621454.html).

Patient 42: <http://wsjkw.sh.gov.cn/xwfb/20200126/734a56a6c9684cebbac859e6fcb9a97c.html>.

Patient 43: [http://wst.hainan.gov.cn/swjw/rdzt/yqfk/202001/t20200127\\_2741242.html](http://wst.hainan.gov.cn/swjw/rdzt/yqfk/202001/t20200127_2741242.html).

Patient 43-45: <https://baijiahao.baidu.com/s?id=1657283292685706125&wfr=spider&for=pc>.
